# Supplementary material for: The crystal structure of a Polerovirus exoribonuclease-resistant RNA shows how diverse sequences are integrated into a conserved fold
Source: PubMed Central journal article supplement — RNA. 2020 Dec;26(12):1767–76. doi: 10.1261/rna.076224.120 (PMC7668246; doi:10.1261/rna.076224.120), 2020-12
Supplement: supp_076224.120_Supplemental_Figure_S1.pdf [file supp_076224.120_Supplemental_Figure_S1.pdf]

```

# STOCKHOLM 1.0
# UNIMARK
#=GF ID Multiple_alignment
SCNMV_NC_003806.3443-3512R      CAA-GCGU--A-A-CCUCCA-----UC-----CGAG-UUGCAA--G-A-GAGG-GAA--A-CGC-----AGU-CUCG--CCGACC-CUG-UU--GCCA---AACAG-UAA
PLRV_NC_001747.3506-3566R      UAA-AACU--A-G-CCAAGE--AUAC-----ACGAG-UUGCAA-GG-A-UUGG-A--A-SUU-CA-----AGC-CUCGU--UACAUC-----AAC

#=GF Tombusviridae:Dianthovirus
RBMV_NC_003756.3458-3527R      UUA-BUGU--A-G-CCUCCA-----CC-----CGAG-UUGCAA--G-A-GGGG-AAC--A-CGC-----AGU-CUCG--CCGACC-CUG-UU--GGCA---AACAG-UAA
RCNMV_AB034916.3457-3526      UUA-BCGC--A-G-CCUCCA-----UC-----CGAG-UUGCAA--G-A-GAGG-AA--GAGG-----AGU-CUCG--CCGACC-CUG-UU--GGCA---AACAG-UAA
CRSV_NC_003530.3395-3469R      UUC-CGCU--A-G-CCGCCA-----A-----CAAAG-UUGCAA--G-A-SCGG-GC--GUUGC-U-----AGC-UUUG--CCGACC-CUG-UU--CCUG--GACAG-CAA
CRSV_MM794505_204-131         UAA-ACGU--A-G-CCGCCA-----A-----CAAAG-UUGCAA--G-A-SCGG-GC--GUUGC-U-----AGC-UUUG--CCGACC-CUG-UU--CCUG--GACAG-CAA

#=GF Tombusviridae:Machlomovirus
MCMV_NC_003627.4098-4163R      CAA-GGUG--A-G-CCGGCA-----U-----GAGG-UUGCAA--G-A-SCGG-AA--CAACC-----AGU-CCUU--C-----UGG-CAG--AGUC--GUGCCA-AUC

#=GF Tombusviridae:Umbrevirus
OPMV_NC_027710.3582-3656R      CAA-CCAC--A-G-CCAAGE-----A-----UUAAG-UUGCAA-GG-G-UUGG-A--G-UGG-C-----AGG-CUUA--CGU---CCGACAGU-ACGACA-ACUGCG-UGU
TBTV_NC_004366.3517-3573      AAA-ACGG--A-G-CUAGAA-----U-----UAGU-UUGCAA-UU-G-CUAG-A--C-CGU-U-----AGC-CACUA--CGCCAG-----ACA
OPMV_EJ372735_2077-2133      GAA-GGCU--A-G-CCGGGC-----A-----UAGU-UUGCAA-GG-G-CCGG-A--A-SCU-C-----AGG-CACUA--GGUGUG-----AAC
UUA-RGUU--A-G-CCAGGC-----A-----UAGU-UUGCAA-GG-G-CUGG-G--G-AGU-U-----AGU-CCUA--GAGCCA-----CUG
ITM72_NC_034243.2885-2940      AUG-CCCG--A-G-CCCGC-----U-----SUAG-UUGCAA--G-A-SCGG-A--GC-SUU-----AGU-CUC--UGAUG-----GGG
CMoMV_FJ188472_2658-2709      GUC-ACGU--A-G-CUAGUA-----U-----CCAGG-UUGCAA-UA--CUAG-A--G-CGU-U-----AGU-CCUG--GGCAGC-----CCC
CMoMV_NC_001726.2661-2715      GUC-ACGU--A-G-CUAGUA-----U-----CCAGG-UUGCAA-UA--CUAG-A--G-CGU-U-----AGU-CCUG--GGCAGC-----CCU

#=GF Luteoviridae:Polerovirus
WLYaV_NC_035451.3370-3427      GUA-AGUC--A-G-CCGCCA-----A-----CACAG-UUGCAA--G-A-SCGG-AA--GA-CGU-----AGU-CUGU--UCAAAU-----CGU
SoYLV_NC_000874.3464-3521      CUA-UCCG--A-G-CCACCA-----U-----UAAG-UUGCAA--G-A-SUGG-AA--CG-GGA-----AGU-CCUA--AGAUAA-----GCC
UUA-GAAC--A-G-CCGACA-----AU-----UCAG-UUGCAA-G-A-UUCG-A--GGUUC-----AGU-CUGA--AUCUA-----GGC
GAC-AGRU--A-G-CCGGUA--U-CA-----GUUG-UUGCAA-UA-G-CCGG-A--G-UUC-U-----AGU-CACG--GUACA-----UCG
MABV_NC_010089.3332-3391      AGA-ACCU--A-G-CCGGAA--AUAC-----GUUG-UUGCAA-UU-G-CCGG-A--AG-UU-A-----AGC-CACG--UACCAA-----AUA
UCA-UAGU--A-G-CCGGAA--AUAC-----GUUG-UUGCAA-UU-G-CCGG-A--AG-UU-A-----AGU-CACG--UACCAA-----AUA
CVDV-RFV_NC_004751.3563-3622      AAA-AGU--A-G-CCGGC--AAAC-----GUAG-UUGCAA-GU-G-CCGG-A--AGU-CA-----AGU-CUAC--ACACA-----GCC
NYDV-RMV_NC_021484.3332-3393R  CUC-AGGU--A-G-CCAGG--AAAU-----UCCAG-UUGCAA-GG-A-CUGG-AU--GA-CU-----AGU-CUGA--UACUA-----AAC
LeYV_LN865080_842-902         CAU-AGCC--A-G-CCACAC--AUAC-----ACAAG-UUGCAA-GU-A-SUGG-A--G-SUU-C-----AGU-CUUG--UACCAU-----AAC
CRLV_NC_006265.3305-3363      GAA-GCU--A-G-CCGAGA--AAAC-----SUUG-UUGCAA-UG-G-UCGG-A--AGC-AA-----AGC-CACG--UACCAAG-----AAA
CPCV2_NC_034247.3465-3523      CUC-AGUU--A-G-CCGGAA--AGUC-----GCUG-UUGCAA-UU-G-CCGG-AA--A-ACU-U-----AGU-CAGC--UACCAA-----AAA
TVDV_NC_010732.3457-3517      AUA-RAAC--A-G-CCAGC--AAAC-----RUCAG-UUGCAA-GG-G-UUGG-A--A-SUU-CA-----AGU-CUGA--UACCAA-----AGC
CABV_NC_003688.3317-3378      AGA-ACAC--A-G-CCAAGC--ACAC-----ACAG-UUGCAA-GG-A-UUGG-A--AG-UUC-G-----AGU-CUGU--UACCAA-----GAG
PVYV_NC_036803.3442-3502      UAU-AACU--A-G-CCAAGC--AUAC-----AUCAG-UUGCAA-GG-G-UUGG-A--A-SUU-CA-----AGU-CUGA--UACCAA-----CAG
PVYV_UX427534_587-647        UAU-AACU--A-G-CCAAGC--AUAC-----AUCAG-UUGCAA-GG-A-UUGG-A--A-SUU-CA-----AGU-CUGA--UACCAA-----UAG
PABV_NC_030225.3378-3437      UUA-RAAG--A-G-CCGAGU--C-AA-----CUCUG-UUGCAA-AG-G-UCGG-A--GG-CUU-A-----AGU-CRAG--ACUAU-----ACC
BMVYV_NC_004756.3343-3402      AAC-ACU--A-G-CCGAGC--AAAC-----GAAAG-UUGCAA-GG-A-UCGG-A--AGU-CA-----AGU-UUUC--ACAUA-----GCC
BCNV_NC_002766.3422-3482      UUA-RAAC--A-G-CCGGU--AAAC-----UAG-AG-UUGCAA-AG-A-CCGG-AA--G-UU-U-----AGU-CUUC--UACCA-----ACA
BVGV_NC_029906.3325-3386      CUG-RAAC--A-G-CCAGC--AAAC-----GUAG-UUGCAA-GU-A-CUGG-AU--AG-CUU-----AGU-CUCG--ACAAU-----GCC
OVS_MM204612_3410-3468      GAA-ACAU--A-G-CCUCAC--AUAC-----ACAG-UUGCAA-GU-G-AGAG-A--G-UUU-U-----AGU-CUGU--UACCA-----GCC
SLPV_MM482114_3572-3630      CAG-CU--A-G-CCCGA--AUUU-----SUUG-UUGCAA-UG-G-CCGG-AAA--AG-AA-----AGU-CRAC--UACUA-----AGG
BaYV_LC428360_3278-3335      GAA-SUU--A-G-CCCUAC--AUAC-----GUAG-UUGCAA-GU-A-AGGG-A--AAC-AA-----AGU-CUAG--ACCGA-----GUA
PDMV_LC428359_3422-3480      CGG-AGUG--A-G-CCAGAC--AUAC-----GUAG-UUGCAA-GU-A-UUGG-A--G-ACU-A-----AGC-UUUG--ACAUAA-----ACU
PeWBVYV_MR333461_3445-3505   UUU-AGUU--A-G-CCAAGC--AUAC-----AUCAG-UUGCAA-GG-G-UUGG-A--A-ACU-UA-----AGU-CUGAU--UACCU-----GAA
UPoLV1_MM645154_3368-3428   UAU-AGUA--A-G-CCAAGC--AUAC-----AUCAG-UUGCAA-GG-A-UUGG-AA-U-ACU-U-----AGC-CUGAU--UACCAA-----ACA
ZABVYV_MR050791_3409-3470    UAC-AGAC--A-G-CCAGC--ACAG-----CAAG-UUGCAA-GU-A-CUGG-AA-G-UUC-UA-----AGU-CUUG--UACAAA-----GAG
PuPV_MM8000833_3379-3437     CAA-AGCC--A-G-CCGAGU--CAA-----GCUUG-UUGCAA-AG-G-UCGG-A--G-SCU-RA-----AGU-CRAG--ACAAU-----ACC
TuYV_L8584020_3338-3395      GAA-SUU--A-G-CCCUAC--AUAC-----GUAG-UUGCAA-GU-A-AGGG-A--AAC-AA-----AGU-UUAC--ACCGA-----GAA
AUA-RAAC--A-G-CCGGU--AAAC-----AUA-RAAC--A-G-CCGGU--AAAC-----GUU-U-----AGU-CUGAU--UACUA-----ACA
FNBMVYV_NC_028793_3525-3585   UAC-RAAC--A-G-CCAGC--AAAC-----GCGG-UUGCAA-GG-A-UUGG-A--A-SUU-CA-----AGU-CUCG--UACCA-----AAC
FNBMVYV_IT563000_3529-3589    UAC-ACU--A-G-CCAGC--AAAC-----ACAG-UUGCAA--G-A-UUGG-A--AGU-AAA-----AGU-CUCG--UACCA-----AAC
TY2_NC_034265.3498-3558      UUA-AGCU--A-G-CCAAGC--AUAC-----ACAG-UUGCAA-GG-A-UUGG-A--A-SUU-CA-----AGC-CUGU--UACUA-----AAC
CAC-GAUC--A-G-CCAAGC--AUAC-----AUCAG-UUGCAA-GG-G-UUGG-A--G-AUC-AC-----AGU-CUGAU--UACCU-----AGC
LRAV_NC_027703.3484-3547      UAC-AUAC--A-G-CCGGC--AUAC-----CUCUG-UUGCAA-GG-G-CCGG-AAA--G-UAU-CUG-----AGU-CRAG--ACACGR-----ACA
WaPV_EK960436_599-657        UAA-AGCC--A-G-CCGAGU--UAGA-----CUUG-UUGCAA-AG-G-UCGG-A--G-SCU-RA-----AGU-CRAG--CACUA-----ACC
ALVE_MF136435_2804-2861      UAA-ACAC--A-G-CCAAUA-----AACUUG-UUGCAA-UA-G-UUGG-A--G-UGU-UC-----AGC-CRAGU--CCCGC-----UAA
CpCSV_NC_008249_3486-3543     ACA-GAGAU--A-G-CCGACU-----AACUAG-UUGCAA--G-A-UCGG-A--GU-CUC-----AGU-CUAGU--CAUUG-----AAA
CpPV1_NC_034246.3377-3434    ACA-GAUA--A-G-CCCUAC-----AACUAG-UUGCAA-GU-G-AGGG-A--GA-UUC-----AGC-CUAGU--UACAG-----GAA
CoLRDV_NC_014545.3448-3508   CCU-GAGCC--A-G-CUCUUA-----AUCUUG-UUGCAA-UG-G-AGAG-A--AG-CUU-RA-----AGU-CRAGU--CACAG-----CUA
SIV_LN865083_839-911         GAA-ACAC--A-G-CCGGCA--AAUAUAACUAAAUAU--GUAGG-UUGCAA--G-A-UCGG-A--G-UGU-ACA-----AGU-CCUAC--AACAGA-----ACA

#=GF Luteoviridae:Enamovirus
ZPEL_MH323436_3743-3798      CUC-CAGU--A-G-UGAAG-----C-----GAAAG-UUGCAA-GU-G-UCAG-A--G-CUG-U-----AGU-CUUC--ACACAC-----GCA
GEV-I_NC_034836.4189-4267     CCC-CCC--A-G-CCGAAA--G-UU-----CUAGG-UUGCAA-UU-G-UCGG-U-----GGC-CUCC--GGC-GUAA-ECU-CAAAUUAACAGG-CCUAG--CAUUAU-----GSU

#=GF Picornaviridae
HuPLV1_NC_032224.3354-3419R   CGA-GAGUC--A-G-CCAAAC--AAAC-----CAAAG-UUGCAA-GU-G-UUGG-A--GA-CUC-AUUCU-----AGU-CUUGU--UACAC-----ACC
HuPLV2_NC_033229.3703-3762   CAA-AAUC--A-G-CCACAC--AUAC-----CAAAG-UUGCAA-GU-A-SUGG-A--G-AUU-C-----AGU-CUUGU--UACCA-----AGU

#=GC SS_cons
#=GC SS_cons_1
#=GC SS_cons_2
//

```

**Supplemental Figure S1: Alignment of xrRNA<sub>LT</sub> sequences.** Each entry lists the official virus acronym, the NCBI accession code, the location of the xrRNA and the sequence in Stockholm format. The alignment in (Steckelberg and Vicens et al. 2018b) was expanded with viral sequences added to the NCBI database between December 2018 and December 2019. The .sto alignment file is also available as a supplementary file. P1, P2, P3, P4 shown in red, green, orange, and lime, respectively. The G–C pair present in Polerovirus but not SCNMV is highlighted in blue.
