# Supplementary material for: The crystal structure of a Polerovirus exoribonuclease-resistant RNA shows how diverse sequences are integrated into a conserved fold
Source: PubMed Central journal article supplement — RNA. 2020 Dec;26(12):1767–76. doi: 10.1261/rna.076224.120 (PMC7668246; doi:10.1261/rna.076224.120), 2020-12
Supplement: supp_076224.120_Supplemental_Figure_S2.pdf [file supp_076224.120_Supplemental_Figure_S2.pdf]

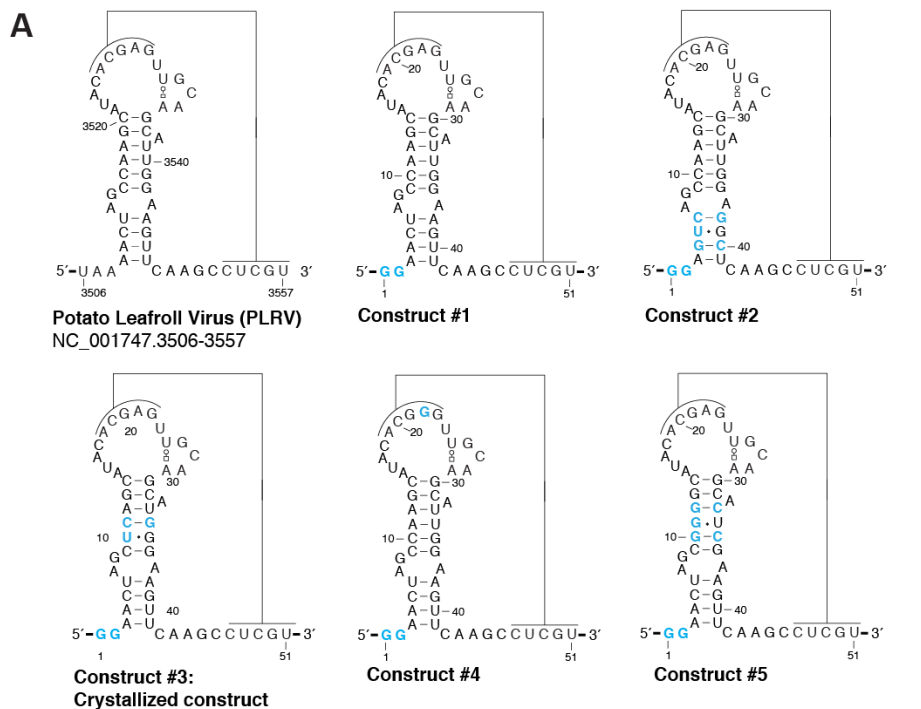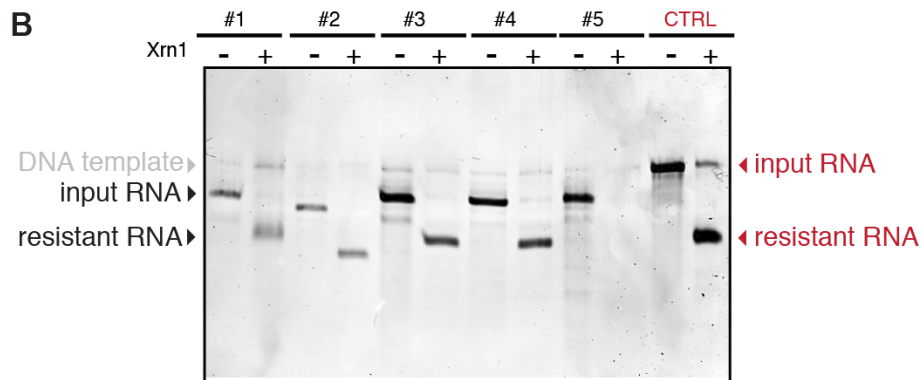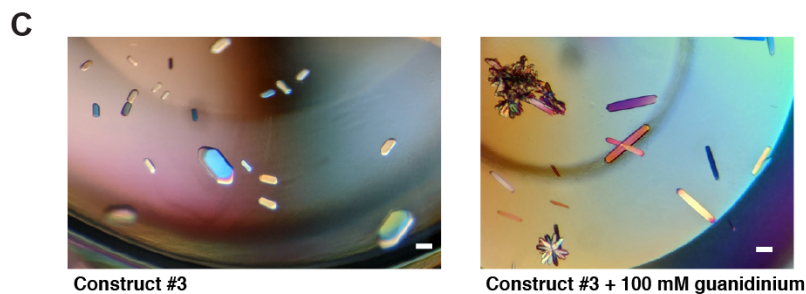

**Supplemental Figure S2: PLRV crystal constructs used in this study.** (A) Wild-type sequence for the PLRV xrRNA<sub>LT</sub> and the five crystal constructs tested for this study. Constructs #2–5 incorporate the G.U phasing module in various locations (Keel et al. 2007). (B) Xrn1 resistance assays of constructs #1–5. Digestion occurred for 2 hrs at 30°C. Denaturing PAGE stained with ethidium bromide. The leader was 15 nucleotides long for #1–5 and 35 nucleotides long for the control sequence (wild-type PLRV). (C) Images of representative crystals. White bar at lower right is 100  $\mu$ m in length.
