# Supplementary material for: The crystal structure of a Polerovirus exoribonuclease-resistant RNA shows how diverse sequences are integrated into a conserved fold
Source: PubMed Central journal article supplement — RNA. 2020 Dec;26(12):1767–76. doi: 10.1261/rna.076224.120 (PMC7668246; doi:10.1261/rna.076224.120), 2020-12
Supplement: supp_076224.120_Supplemental_Figure_S4.pdf [file supp_076224.120_Supplemental_Figure_S4.pdf]

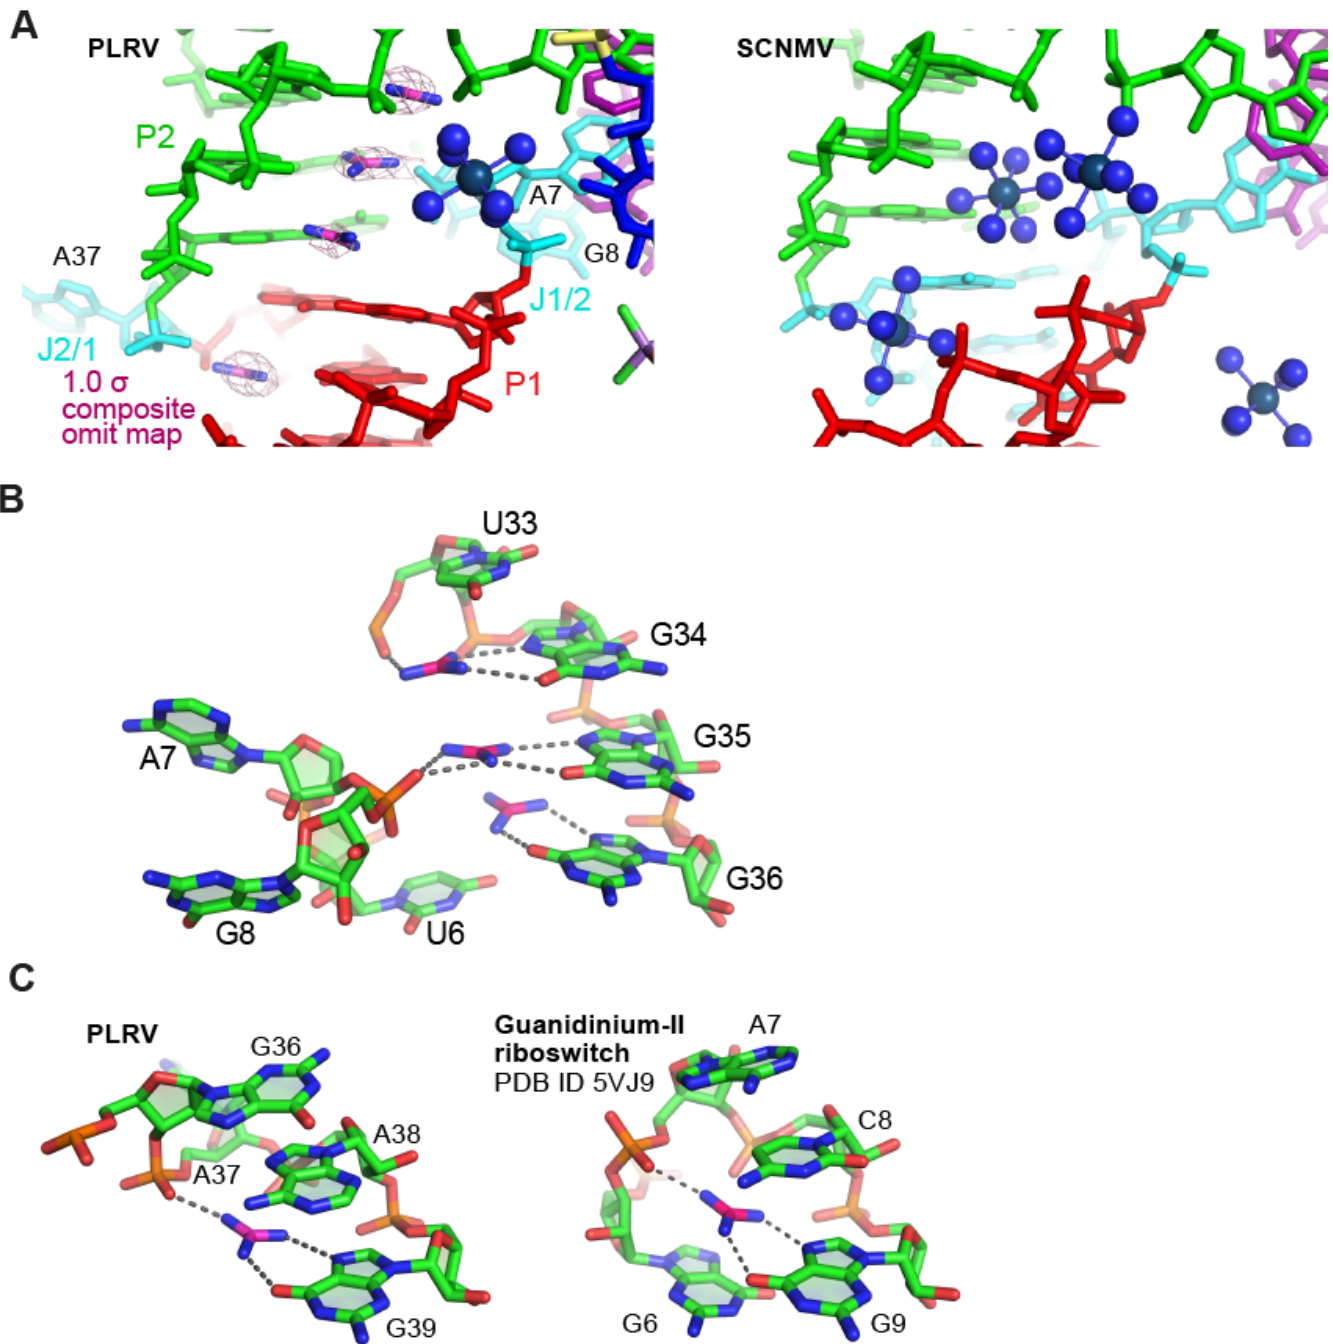

**Supplemental Figure S4: Structural details of guanidinium binding to the PLRV xrRNA<sub>LT</sub>.** (A) Guanidinium molecules (carbon atom in magenta) bind near the J1/2 region of PLRV (left), where iridium(III) hexammine ligands (blue) bind in the SCNMV structure (right). The composite  $2F_o - |F_c|$  map was calculated in Phenix using default parameters. (B) Stacked guanidiniums form a 'spine' in the deep groove of G34–G36. (C) A guanidinium similarly bridges a phosphate oxygen and the Hoogsteen side of a downstream guanine in PLRV and in a guanidinium-II riboswitch (Reiss and Strobel 2017).
