# Supplementary material for: The crystal structure of a Polerovirus exoribonuclease-resistant RNA shows how diverse sequences are integrated into a conserved fold
Source: PubMed Central journal article supplement — RNA. 2020 Dec;26(12):1767–76. doi: 10.1261/rna.076224.120 (PMC7668246; doi:10.1261/rna.076224.120), 2020-12
Supplement: supp_076224.120_Supplemental_Figure_S5.pdf [file supp_076224.120_Supplemental_Figure_S5.pdf]

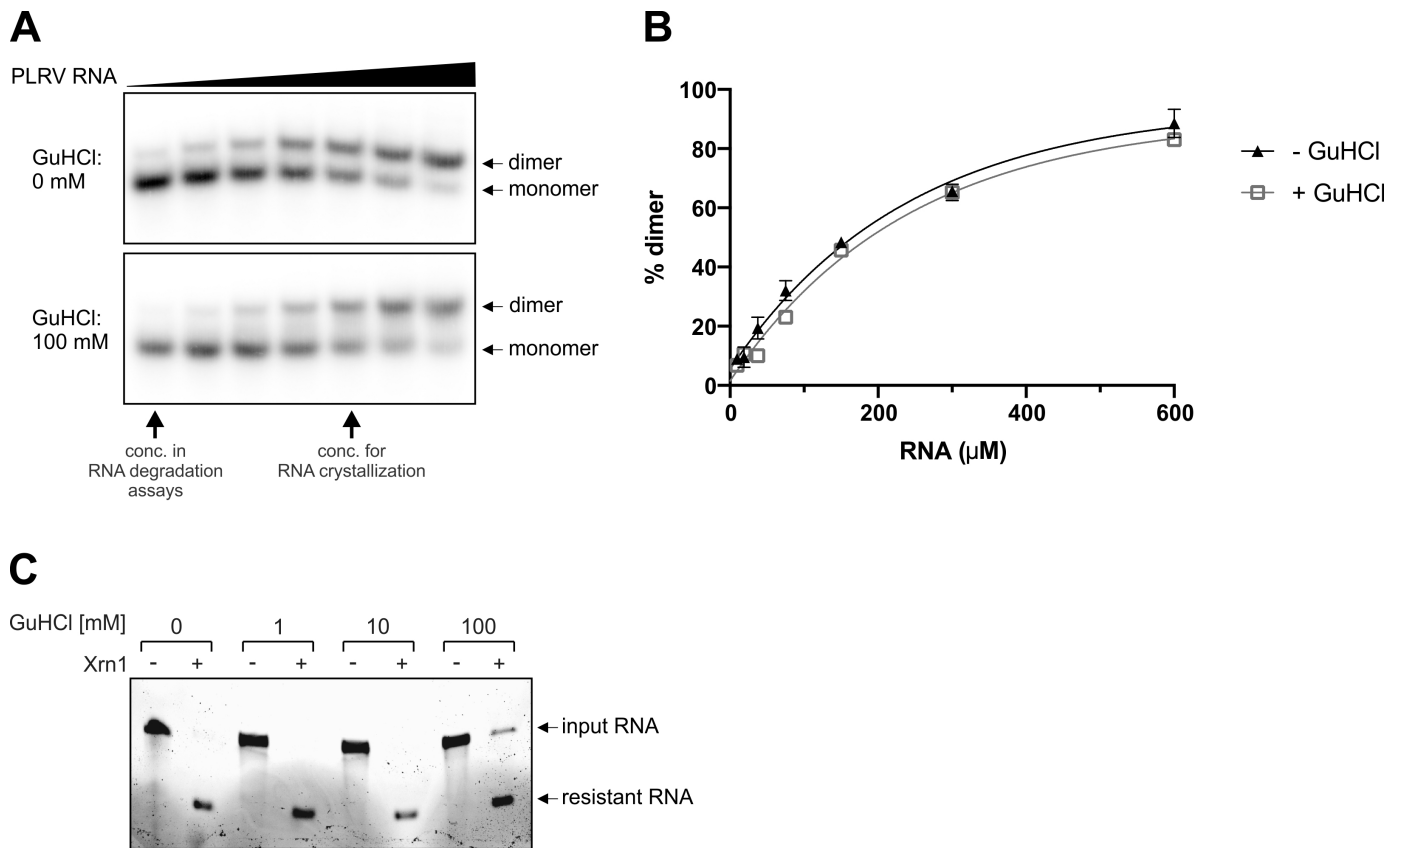

**Supplemental Figure S5: Biochemical characterization of guanidinium-RNA interactions.** (A) Electron mobility shift assay (EMSA) of the PLRV RNA used for crystallization and structure determination, in the absence (top) or presence (bottom) of 100 mM guanidine hydrochloride. Arrows below the gels depict the RNA concentrations used for *in vitro* Xrn1 degradation assays and for RNA crystallography. (B) Quantitated EMSA data from (A),  $n = 3$ , error bars = SD. 50% of the RNA is dimerized at 165  $\mu\text{M}$ . (C) *In vitro* Xrn1 degradation assay of the wild type PLRV RNA in the presence of the indicated concentrations of guanidine hydrochloride.
