# Supplementary material for: The crystal structure of a Polerovirus exoribonuclease-resistant RNA shows how diverse sequences are integrated into a conserved fold
Source: PubMed Central journal article supplement — RNA. 2020 Dec;26(12):1767–76. doi: 10.1261/rna.076224.120 (PMC7668246; doi:10.1261/rna.076224.120), 2020-12
Supplement: supp_076224.120_Supplemental_Figure_S6.pdf [file supp_076224.120_Supplemental_Figure_S6.pdf]

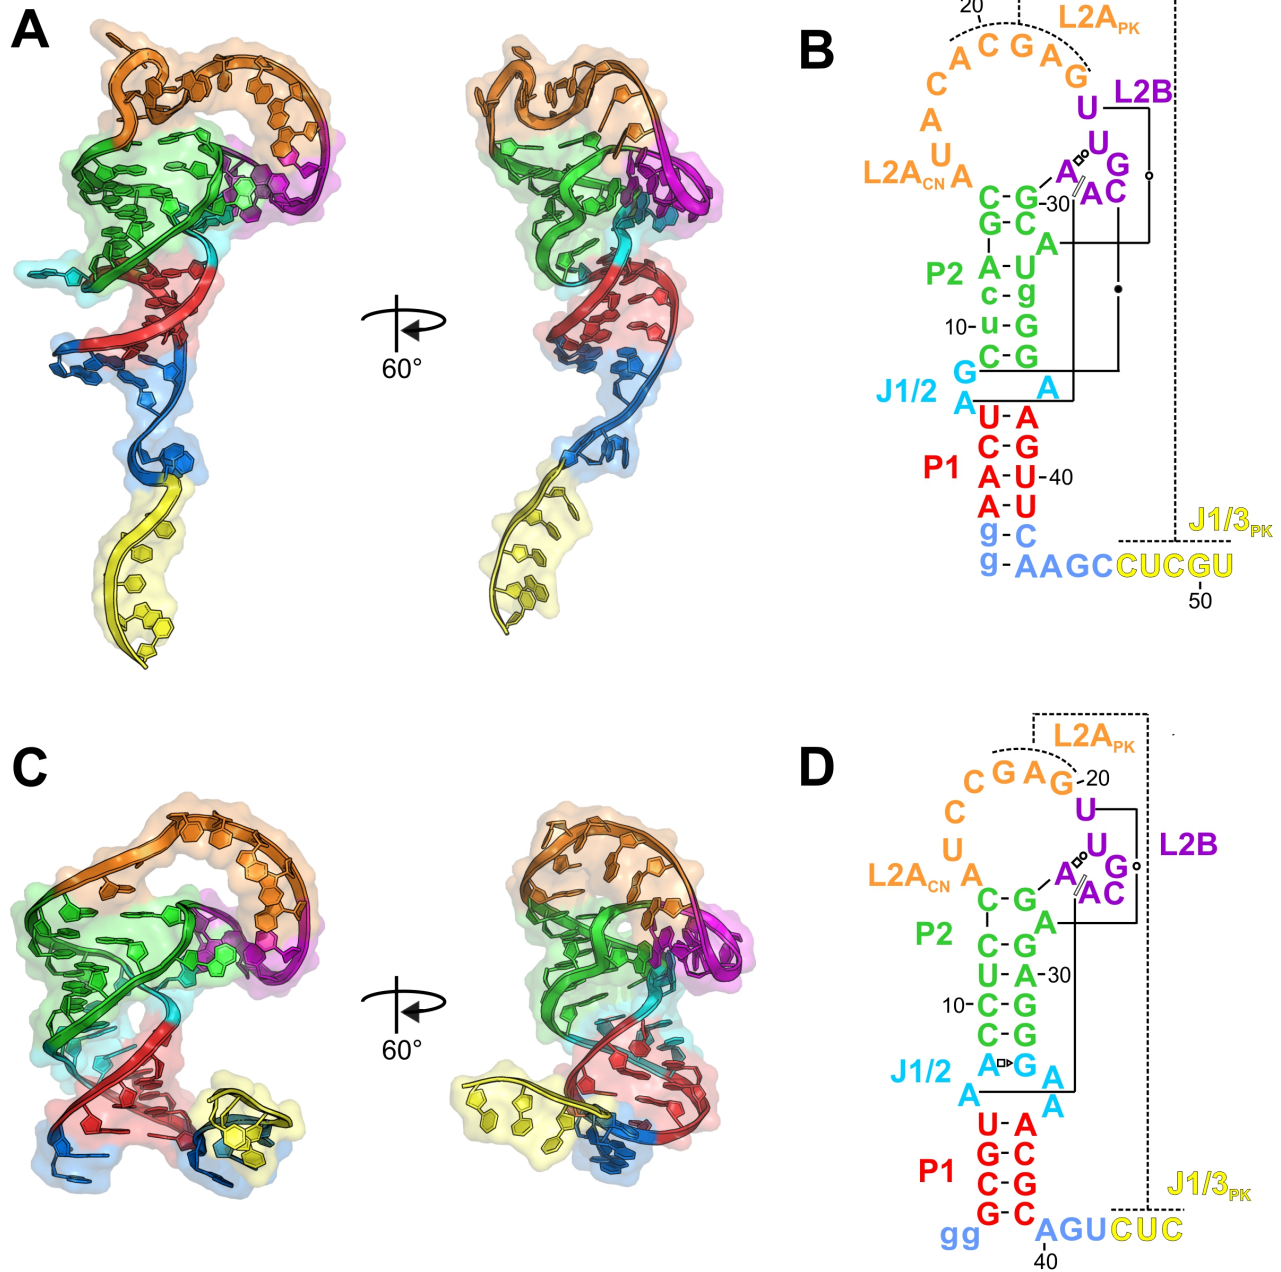

**Supplemental Figure S6: Comparison of PLRV and SCNMV xrRNA structures.** (A) Ribbon representation of the PLRV xrRNA structure. (B) Secondary structure of the crystallized PLRV RNA. (C) Ribbon representation of the SCNMV xrRNA. (D) Secondary structure of the SCNMV RNA. Colors match Fig 2. Engineered nucleotides are shown in lower case letters. Non-Watson-Crick base pairs are in Leontis-Westhof annotation (Leontis and Westhof 2001).
