# Supplementary material for: The crystal structure of a Polerovirus exoribonuclease-resistant RNA shows how diverse sequences are integrated into a conserved fold
Source: PubMed Central journal article supplement — RNA. 2020 Dec;26(12):1767–76. doi: 10.1261/rna.076224.120 (PMC7668246; doi:10.1261/rna.076224.120), 2020-12
Supplement: supp_076224.120_Supplemental_Figure_S7.pdf [file supp_076224.120_Supplemental_Figure_S7.pdf]

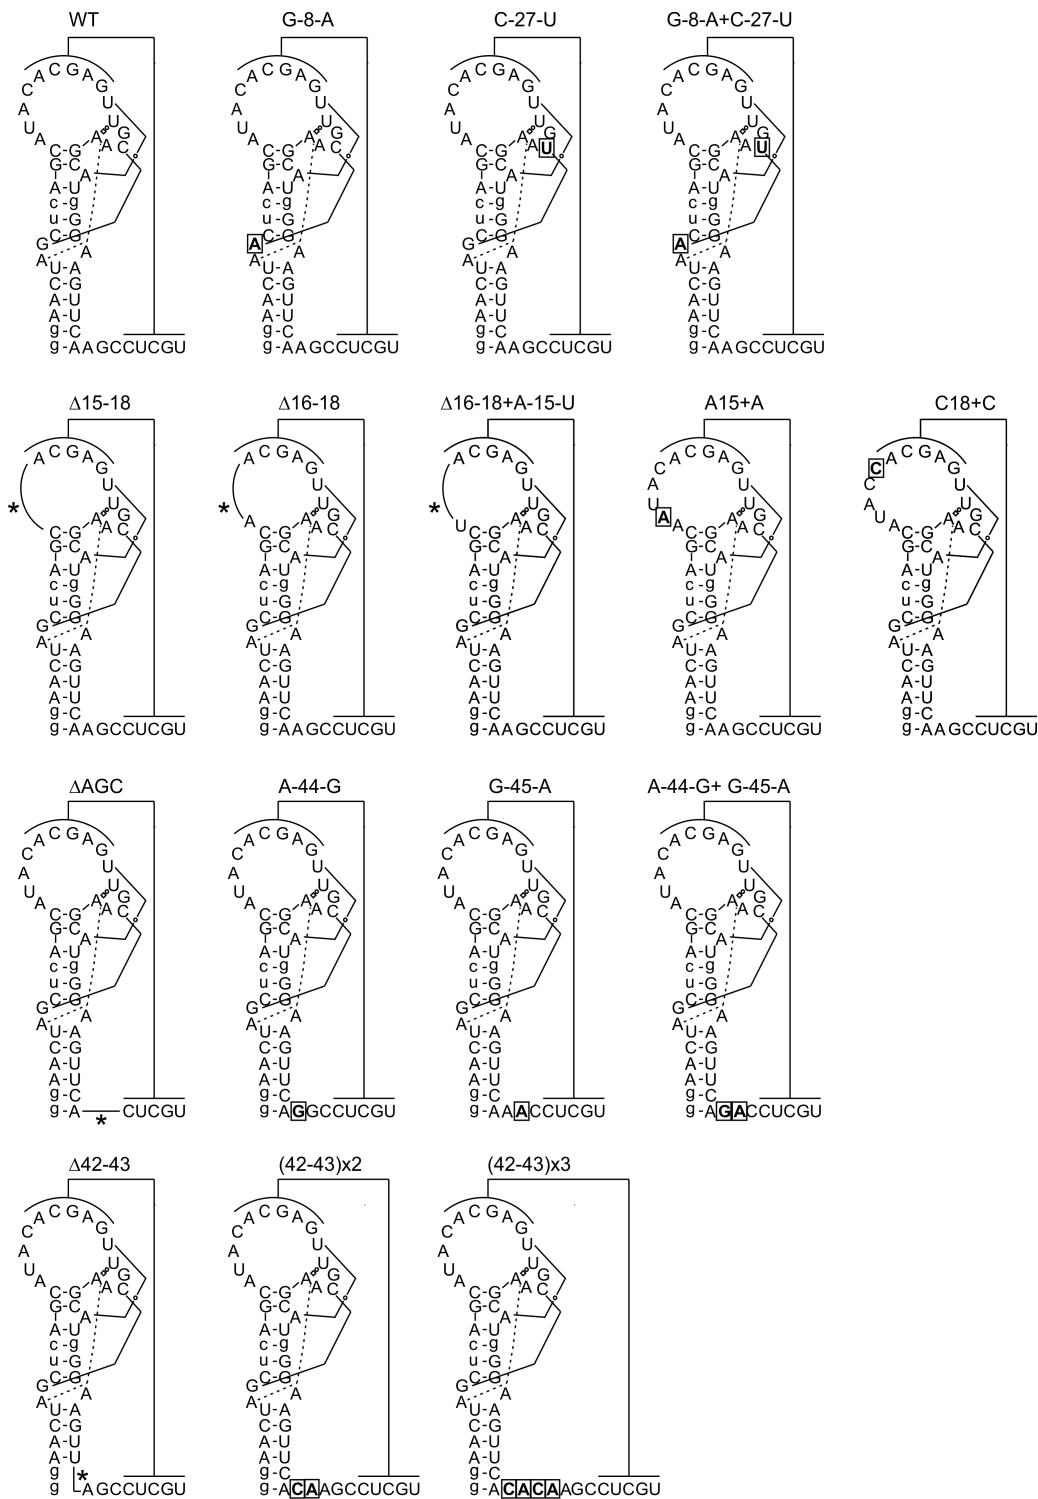

**Supplemental Figure S7: Predicted secondary structures of the mutants used in functional assays.** Secondary structures of wild-type and mutant PLRV xrRNA constructs used in *in vitro* assays. Substitution and insertion mutations are shown boxed and in bold, deletion mutations are shown as lines and indicated by an asterisk (\*). For RNAs used in *in vitro* RNA degradation assays, the sequence shown was usually preceded by a 34 nucleotide leader based on the endogenous viral genomic context (5'-GCCACCACAAAAGAACACUGAAGGAGCUCACUAA-3'), to allow efficient loading of Xrn1. Only exception: RNAs in Fig. S2B had a 15 nucleotide leader (5'-GAAGGAGCUCACUAA-3') where indicated.
