# Supplementary material for: The crystal structure of a Polerovirus exoribonuclease-resistant RNA shows how diverse sequences are integrated into a conserved fold
Source: PubMed Central journal article supplement — RNA. 2020 Dec;26(12):1767–76. doi: 10.1261/rna.076224.120 (PMC7668246; doi:10.1261/rna.076224.120), 2020-12
Supplement: supp_076224.120_Supplemental_Table_S1.pdf [file supp_076224.120_Supplemental_Table_S1.pdf]

**Table 1. Data collection and refinement statistics.**

|                                                    |                                   |
|----------------------------------------------------|-----------------------------------|
| <b>Wavelength</b>                                  | 0.9235                            |
| <b>Resolution range</b>                            | 49.72 - 2.60 (2.697 - 2.60)       |
| <b>Space group</b>                                 | P 4 <sub>3</sub> 2 <sub>1</sub> 2 |
| <b>Unit cell</b>                                   | 72.19 72.19 137.14 90 90 90       |
| <b>Total reflections</b>                           | 482755 (43140)                    |
| <b>Unique reflections</b>                          | 11689 (1135)                      |
| <b>Multiplicity</b>                                | 41.3 (38.0)                       |
| <b>Completeness (%)</b>                            | 99.64 (99.56)                     |
| <b>Mean I/sigma(I)</b>                             | 30.86 (2.53)                      |
| <b>Wilson B-factor</b>                             | 63.30                             |
| <b>R-merge</b>                                     | 0.09956 (1.663)                   |
| <b>R-meas</b>                                      | 0.1008 (1.685)                    |
| <b>R-pim</b>                                       | 0.01561 (0.2697)                  |
| <b>CC<sub>1/2</sub></b>                            | 1 (0.914)                         |
| <b>CC*</b>                                         | 1 (0.977)                         |
| <b>Reflections used in refinement</b>              | 11669 (1134)                      |
| <b>Reflections used for R-free</b>                 | 598 (53)                          |
| <b>R-work</b>                                      | 0.2246 (0.3888)                   |
| <b>R-free</b>                                      | 0.2534 (0.4179)                   |
| <b>CC(work)</b>                                    | 0.927 (0.721)                     |
| <b>CC(free)</b>                                    | 0.937 (0.748)                     |
| <b>Number of non-hydrogen atoms</b>                | 2340                              |
| <b>macromolecules</b>                              | 2144                              |
| <b>ligands</b>                                     | 196                               |
| <b>Coordinate error (Maximum-likelihood based)</b> | 0.43                              |
| <b>Phase error (°, Maximum-likelihood based)</b>   | 33.42                             |
| <b>RMS(bonds)</b>                                  | 0.001                             |
| <b>RMS(angles)</b>                                 | 0.44                              |
| <b>Correct sugar puckers (%)</b>                   | 99.0                              |
| <b>Correct backbone conformations (%)</b>          | 93.0                              |
| <b>Clashscore</b>                                  | 2.62                              |
| <b>Average B-factor</b>                            | 62.95                             |
| <b>macromolecules</b>                              | 59.43                             |
| <b>ligands</b>                                     | 101.50                            |
| <b>Number of TLS groups</b>                        | 1                                 |

Statistics for the highest-resolution shell are shown in parentheses.
